# Supplementary material for: Semiconducting liquid crystalline dispersions with precisely adjustable band gaps and polarized photoluminescence
Source: Royal Society of Chemistry journal article supplement (doi:10.1039/d4mh01876a), 2025-01-01
Supplement: d4mh01876a1.pdf [file d4mh01876a1.pdf]

ELECTRONIC SUPPLEMENTARY INFORMATION FOR

**Semiconducting Liquid Crystalline Dispersions with  
Precisely Adjustable Band Gaps and Polarized  
Photoluminescence**

Tingting Zhou,<sup>1,2</sup> Penghao Guo,<sup>1,2</sup> Xuelian Jiang,<sup>1,2</sup> Hongbo Zhao,<sup>1,2</sup> Qing Zhang,<sup>3</sup> Pei-Xi Wang.<sup>1,2\*</sup>

<sup>1</sup> School of Nano-Tech and Nano-Bionics, University of Science and Technology of China, 96 Jinzhai Road, Hefei, Anhui, 230026, P. R. China

<sup>2</sup> i-Lab, Suzhou Institute of Nano-Tech and Nano-Bionics of the Chinese Academy of Sciences, 398 Ruoshui Road, Suzhou Industrial Park, Suzhou, Jiangsu, 215123, P. R. China

<sup>3</sup> NANO-X Vacuum Interconnected Nanotech Workstation, Suzhou Institute of Nano-Tech and Nano-Bionics of the Chinese Academy of Sciences, 385 Ruoshui Road, Suzhou Industrial Park, Suzhou, Jiangsu, 215123, P. R. China

\*Correspondence: pxwang2020@sinano.ac.cn

## EXPERIMENTAL METHODS

### Materials

Hydrochloric acid (37 wt.% in water, Sigma-Aldrich), hydrobromic acid (48 wt.% in water, Sigma-Aldrich), hydroiodic acid (57 wt.% in water, Sigma-Aldrich), manganese(II) acetate tetrahydrate (99%, Sigma-Aldrich), lead(II) oxide (99%, Sigma-Aldrich), n-butylamine (99.5%, Sigma-Aldrich), 2-phenylethylamine (99%, Sigma-Aldrich), phenylmethylaniline (99%, Sigma-Aldrich), [(4-fluorophenyl)methyl]amine (97%, Sigma-Aldrich), [(4-chlorophenyl)methyl]amine (98%, Sigma-Aldrich), N,N-dimethylformamide (anhydrous, 99.8 %, Sigma-Aldrich), cis-9-octadecenoic acid (oleic acid; > 99.0 %, Sigma-Aldrich), cis-1-amino-9-octadecene (oleylamine; > 98.0 %, Sigma-Aldrich), chlorobenzene (anhydrous, 99.8 %, Sigma-Aldrich), and cyclohexane (anhydrous, 99.5 %, Sigma-Aldrich) were used as received.

### Characterization

Photoluminescence emission spectroscopy was conducted on a Hitachi F-4600 Fluorescence Spectrophotometer and the perovskite liquid crystalline dispersions were sealed in quartz cuvettes with an optical path length of 1 mm. Field emission scanning electron spectroscopy was performed on a Hitachi Regulus 8230 Ultra-high Resolution Scanning Electron Microscope. Atomic force microscopy was conducted on a Bruker Dimension Icon Atomic Force Microscope with ScanAsyst. Samples for SEM and AFM observations were prepared by spin-coating the colloidal lyotropic liquid crystalline dispersions of perovskite nanoplatelets (about 100 mg per mL in chlorobenzene) onto flat silicon (111) surfaces at a spinning speed of 6000 revolutions per minute for 60 seconds followed by thermal annealing at 373 K for 10 minutes. Excess surfactants on the samples were removed by immersion in a large volume (50 mL) of cyclohexane for about 30 minutes then dried in a nitrogen or argon atmosphere. Powder X-ray diffraction patterns were collected on a Bruker D8 ADVANCE Diffractometer using copper K-alpha radiation (with a wavelength of 0.15406 nm). Polarized optical microscopy images were obtained from a BM2100POL Polarized Optical Microscope.

Under White Light

Under 365-nm Ultraviolet Light

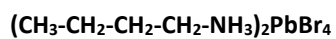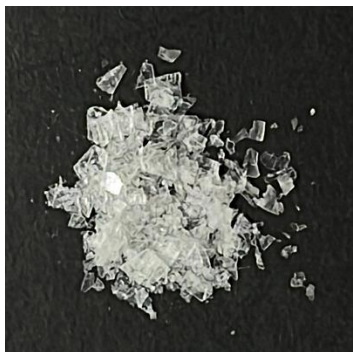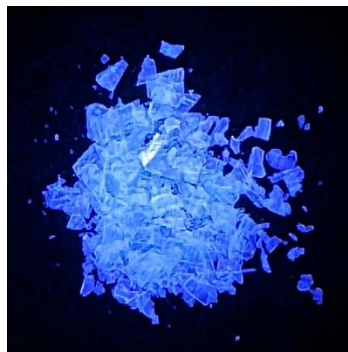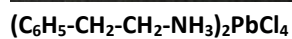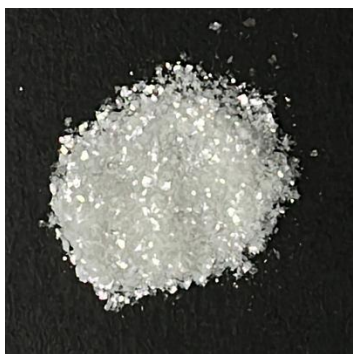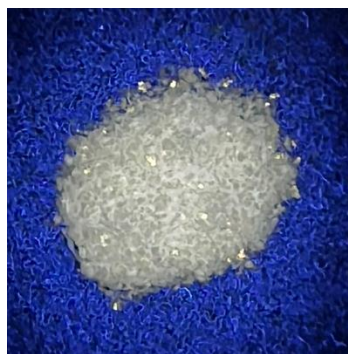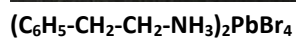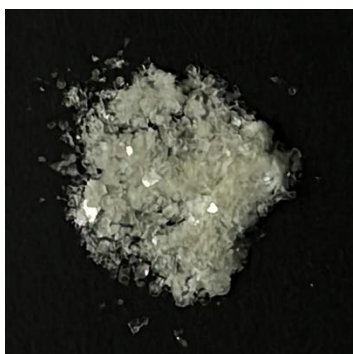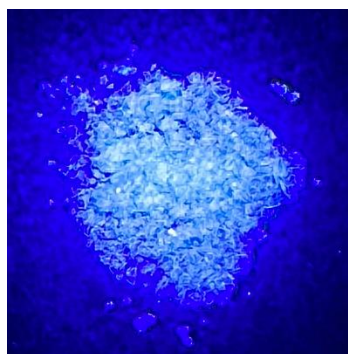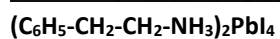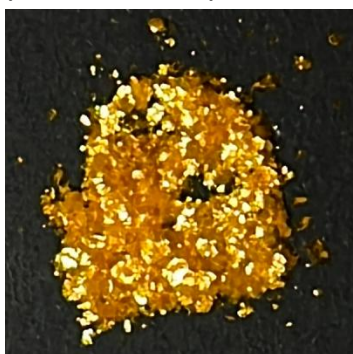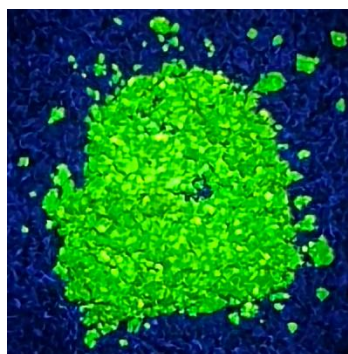

**Figure S1.** Photographs showing the synthesized two-dimensional organic-inorganic lead halide perovskite crystals of  $(\text{CH}_3\text{-CH}_2\text{-CH}_2\text{-CH}_2\text{-NH}_3)_2\text{PbBr}_4$ ,  $(\text{C}_6\text{H}_5\text{-CH}_2\text{-CH}_2\text{-NH}_3)_2\text{PbCl}_4$ ,  $(\text{C}_6\text{H}_5\text{-CH}_2\text{-CH}_2\text{-NH}_3)_2\text{PbBr}_4$ , and  $(\text{C}_6\text{H}_5\text{-CH}_2\text{-CH}_2\text{-NH}_3)_2\text{PbI}_4$ .

Under White Light

Under 365-nm Ultraviolet Light

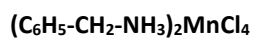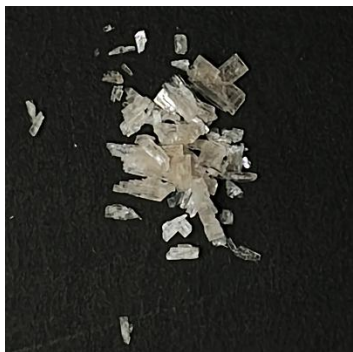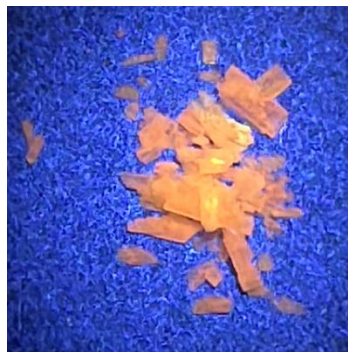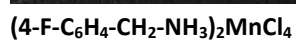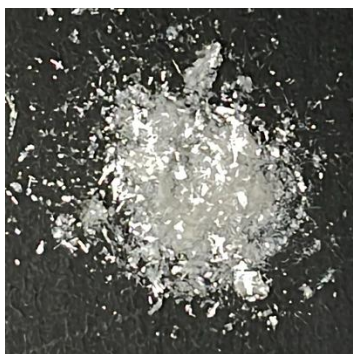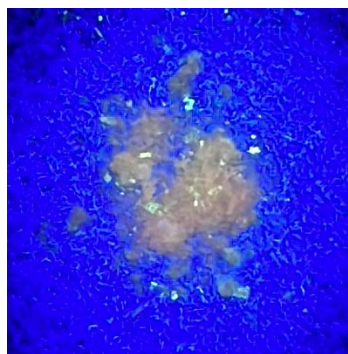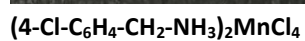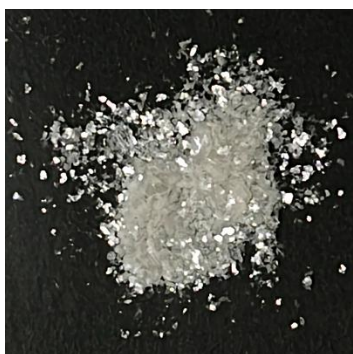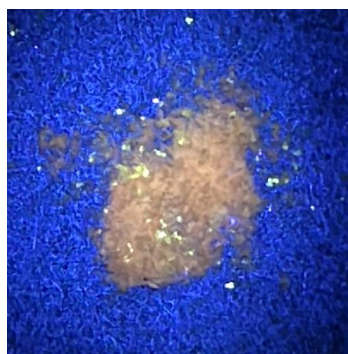

**Figure S2.** Photographs of the synthesized two-dimensional organic-inorganic manganese chloride perovskite crystals of  $(\text{C}_6\text{H}_5\text{-CH}_2\text{-NH}_3)_2\text{MnCl}_4$ ,  $(4\text{-F-C}_6\text{H}_4\text{-CH}_2\text{-NH}_3)_2\text{MnCl}_4$ , and  $(4\text{-Cl-C}_6\text{H}_4\text{-CH}_2\text{-NH}_3)_2\text{MnCl}_4$ , where photos in the left column were taken under white light, while photos in the right column were taken under ultraviolet light with a wavelength of 365 nanometers.



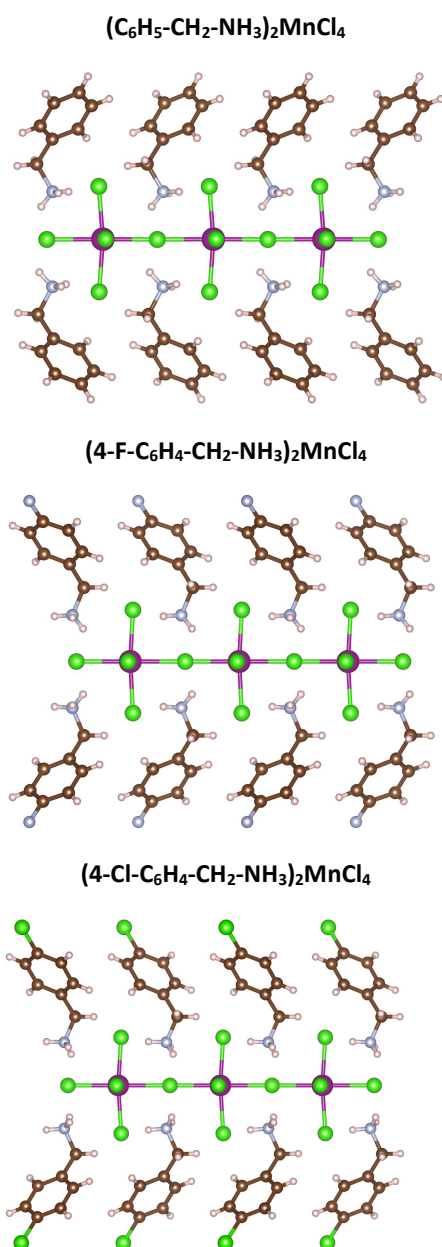

**Figure S3.** Crystal structures (obtained by single-crystal X-ray diffraction analysis) of perovskites  $(\text{C}_6\text{H}_5\text{-CH}_2\text{-NH}_3)_2\text{MnCl}_4$ ,  $(4\text{-F-C}_6\text{H}_4\text{-CH}_2\text{-NH}_3)_2\text{MnCl}_4$ , and  $(4\text{-Cl-C}_6\text{H}_4\text{-CH}_2\text{-NH}_3)_2\text{MnCl}_4$ .

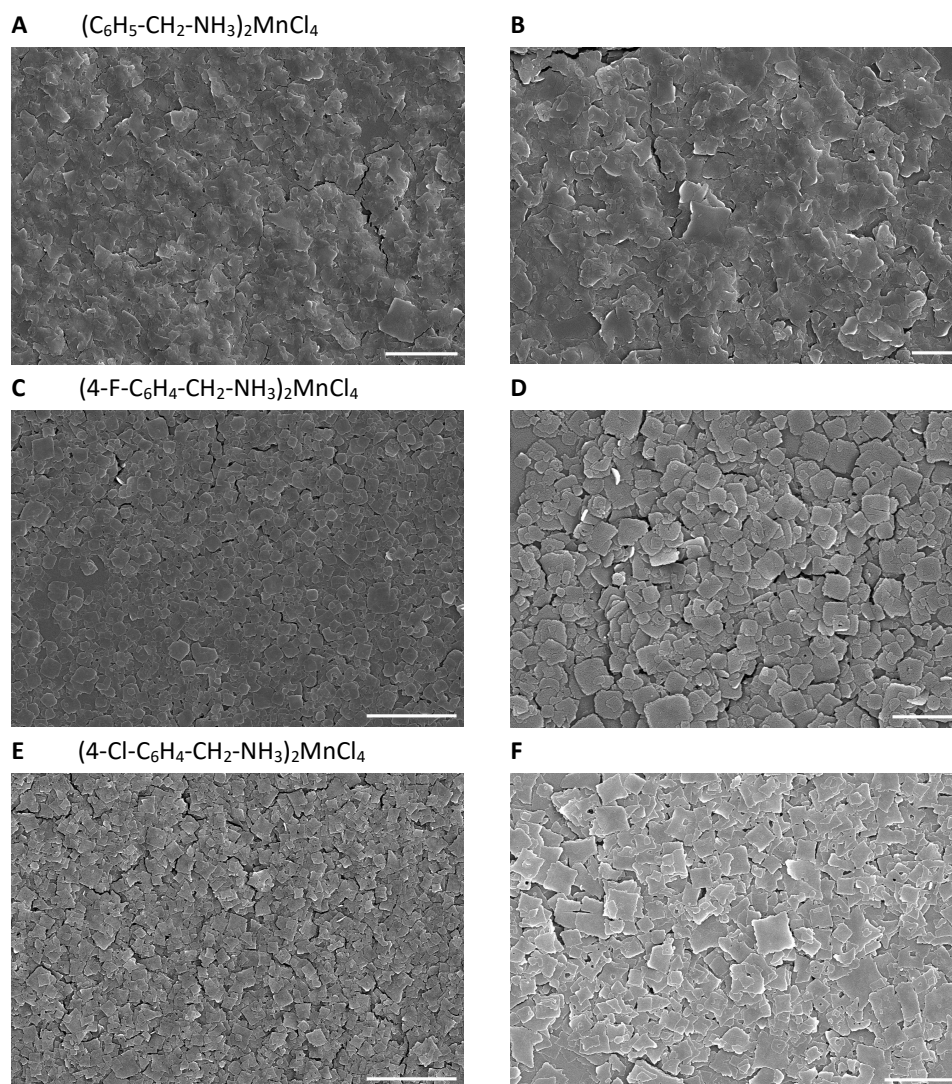

**Figure S4.** Scanning electron microscopy images showing plate-shaped colloidal nanocrystals of  $(\text{C}_6\text{H}_5\text{-CH}_2\text{-NH}_3)_2\text{MnCl}_4$  (**A,B**),  $(4\text{-F-C}_6\text{H}_4\text{-CH}_2\text{-NH}_3)_2\text{MnCl}_4$  (**C,D**), and  $(4\text{-Cl-C}_6\text{H}_4\text{-CH}_2\text{-NH}_3)_2\text{MnCl}_4$  (**E,F**). Scale bars: 5  $\mu\text{m}$  (**A,C,E**), 2  $\mu\text{m}$  (**B,D,F**).

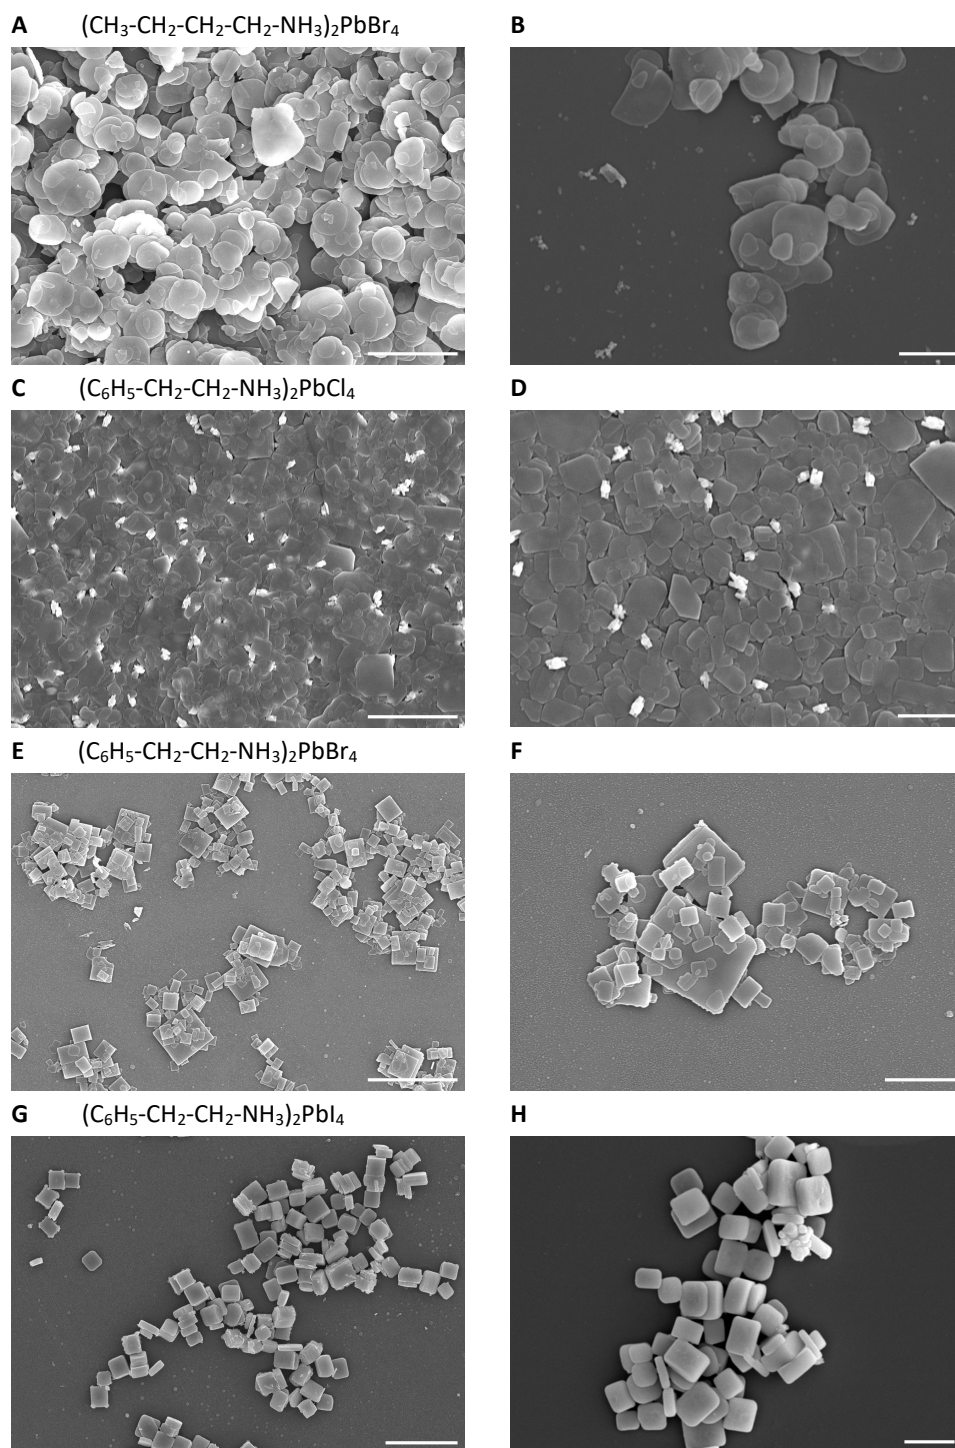

**Figure S5.** Scanning electron microscopy images of the colloidal nanoparticles of  $(\text{CH}_3\text{-CH}_2\text{-CH}_2\text{-CH}_2\text{-NH}_3)_2\text{PbBr}_4$  (**A,B**),  $(\text{C}_6\text{H}_5\text{-CH}_2\text{-CH}_2\text{-NH}_3)_2\text{PbCl}_4$  (**C,D**),  $(\text{C}_6\text{H}_5\text{-CH}_2\text{-CH}_2\text{-NH}_3)_2\text{PbBr}_4$  (**E,F**), and  $(\text{C}_6\text{H}_5\text{-CH}_2\text{-CH}_2\text{-NH}_3)_2\text{PbI}_4$  (**G,H**). Scale bars: 5  $\mu\text{m}$  (**A,C,E,G**), 2  $\mu\text{m}$  (**B,D,F,H**).

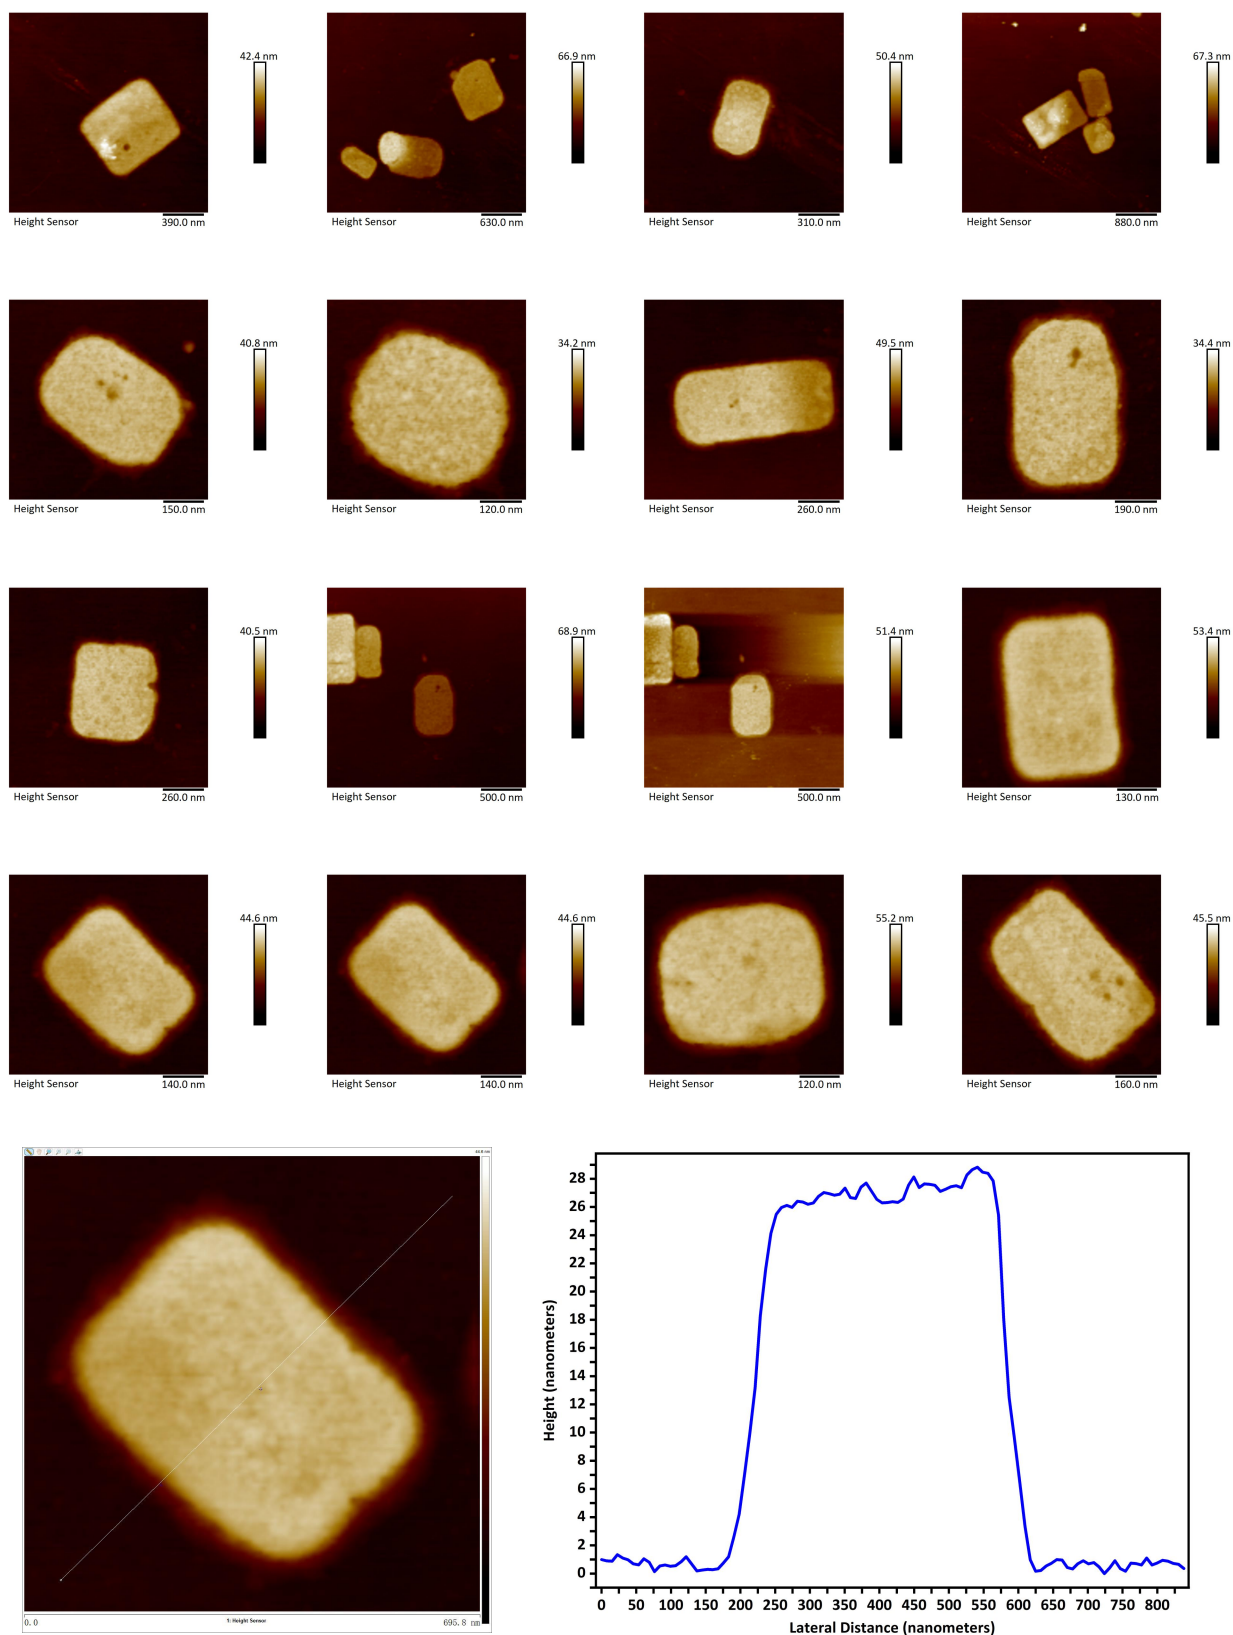

**Figure S6.** Atomic force microscopy images and height profiles showing lateral dimensions and thicknesses of different  $(\text{C}_6\text{H}_5\text{-CH}_2\text{-CH}_2\text{-NH}_3)_2\text{PbBr}_4$  perovskite nanoplatelets.

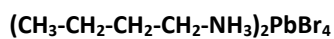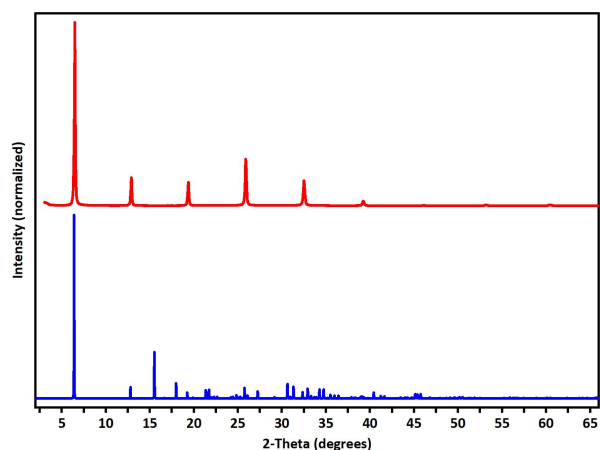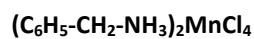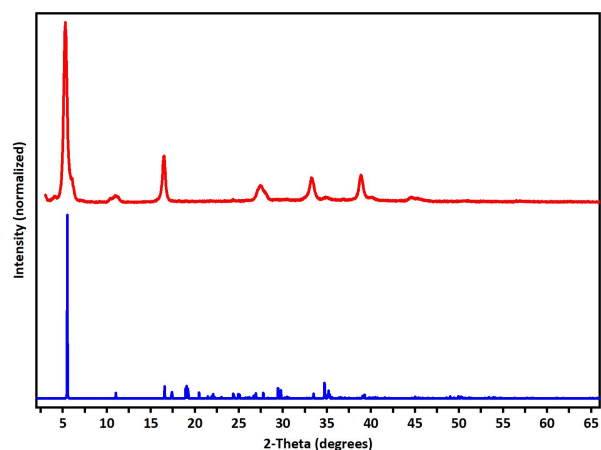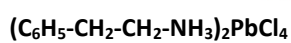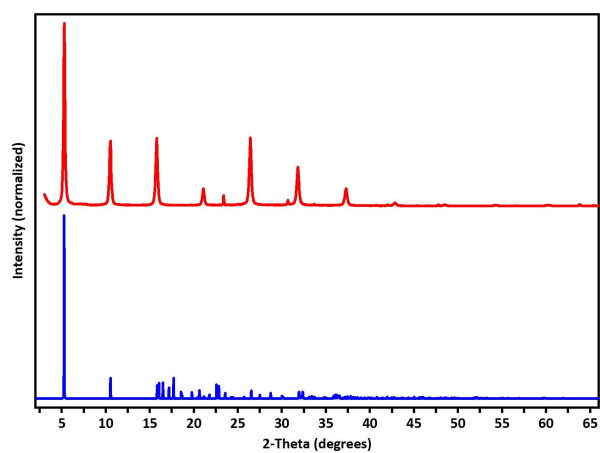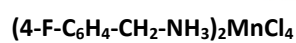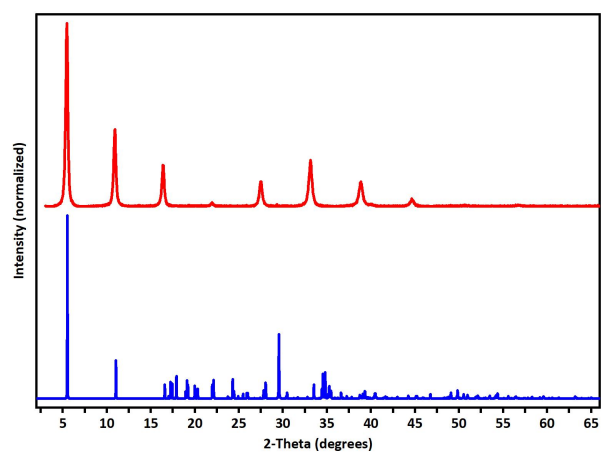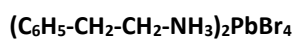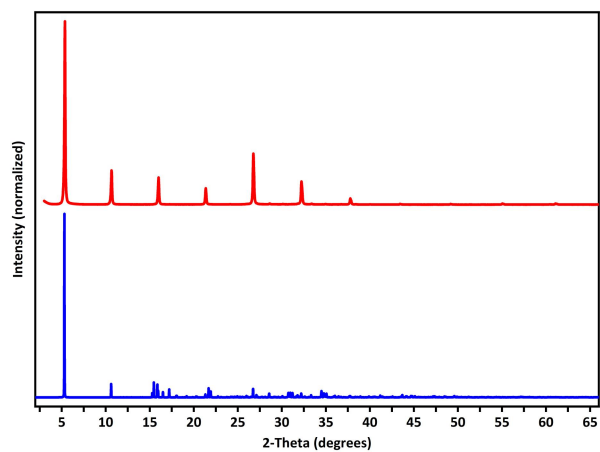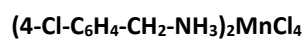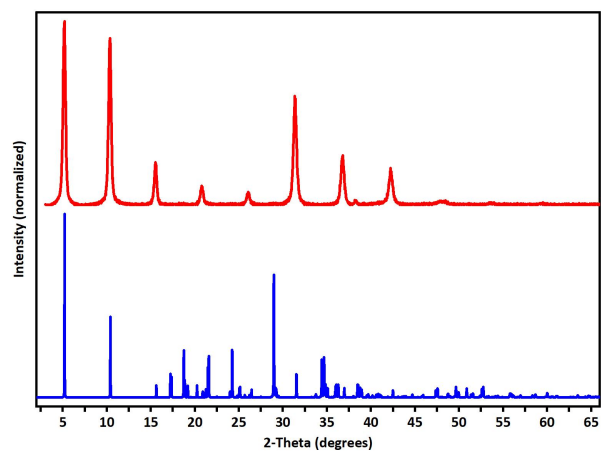

**Figure S7.** Powder X-ray diffraction patterns obtained by experimental measurements of spin-coated and dried thin films of colloidal liquid crystalline dispersions of perovskite nanoplatelets (upper red curves) and by simulations based on corresponding single-crystal X-ray diffraction data (lower blue curves).



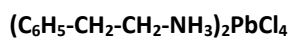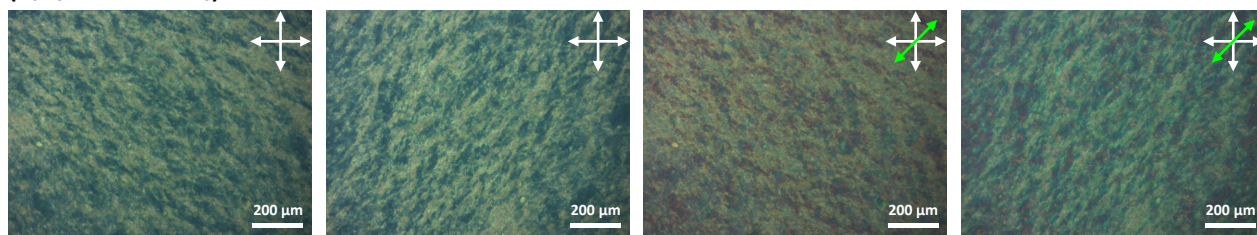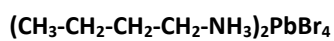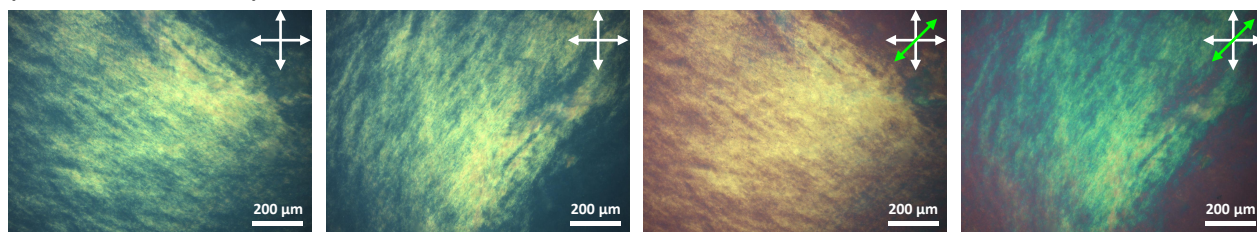

**Figure S8.** Polarized optical microscopy images showing the liquid crystalline phases formed by colloidal nanoplatelets of two-dimensional lead(II) halide perovskites. These samples were observed between two perpendicularly oriented linear polarizers (the left two columns) and with a 530-nm full-wavelength retardation plate (the right two columns).

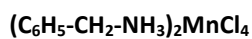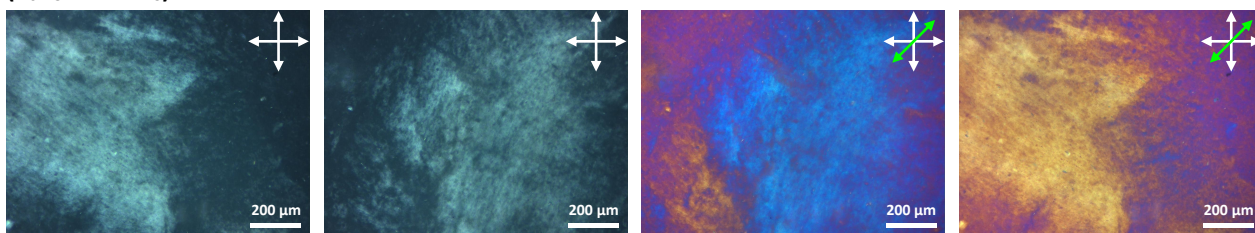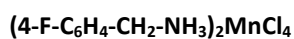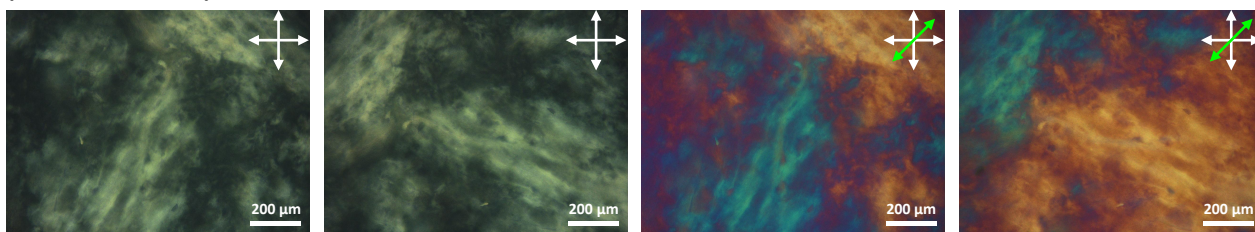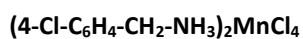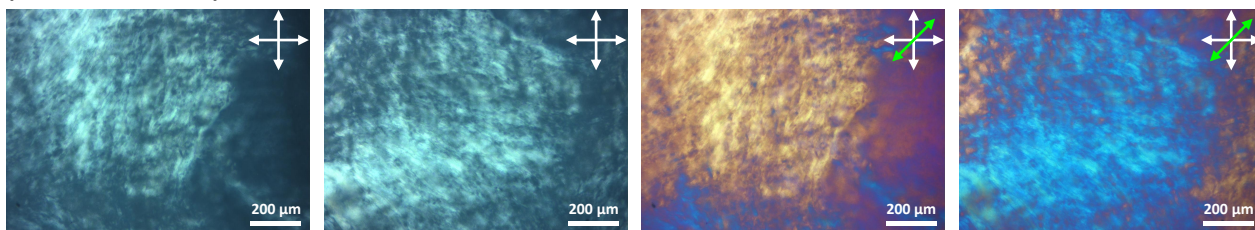

**Figure S9.** Polarized optical microscopy images showing the liquid crystalline phases formed by colloidal nanoplatelets of two-dimensional organic-inorganic manganese(II) chloride perovskites. In the left two columns, the samples were observed between two perpendicularly oriented linear polarizers; in the right two columns, a 530-nm full-wavelength retardation plate was inserted into the optical path.

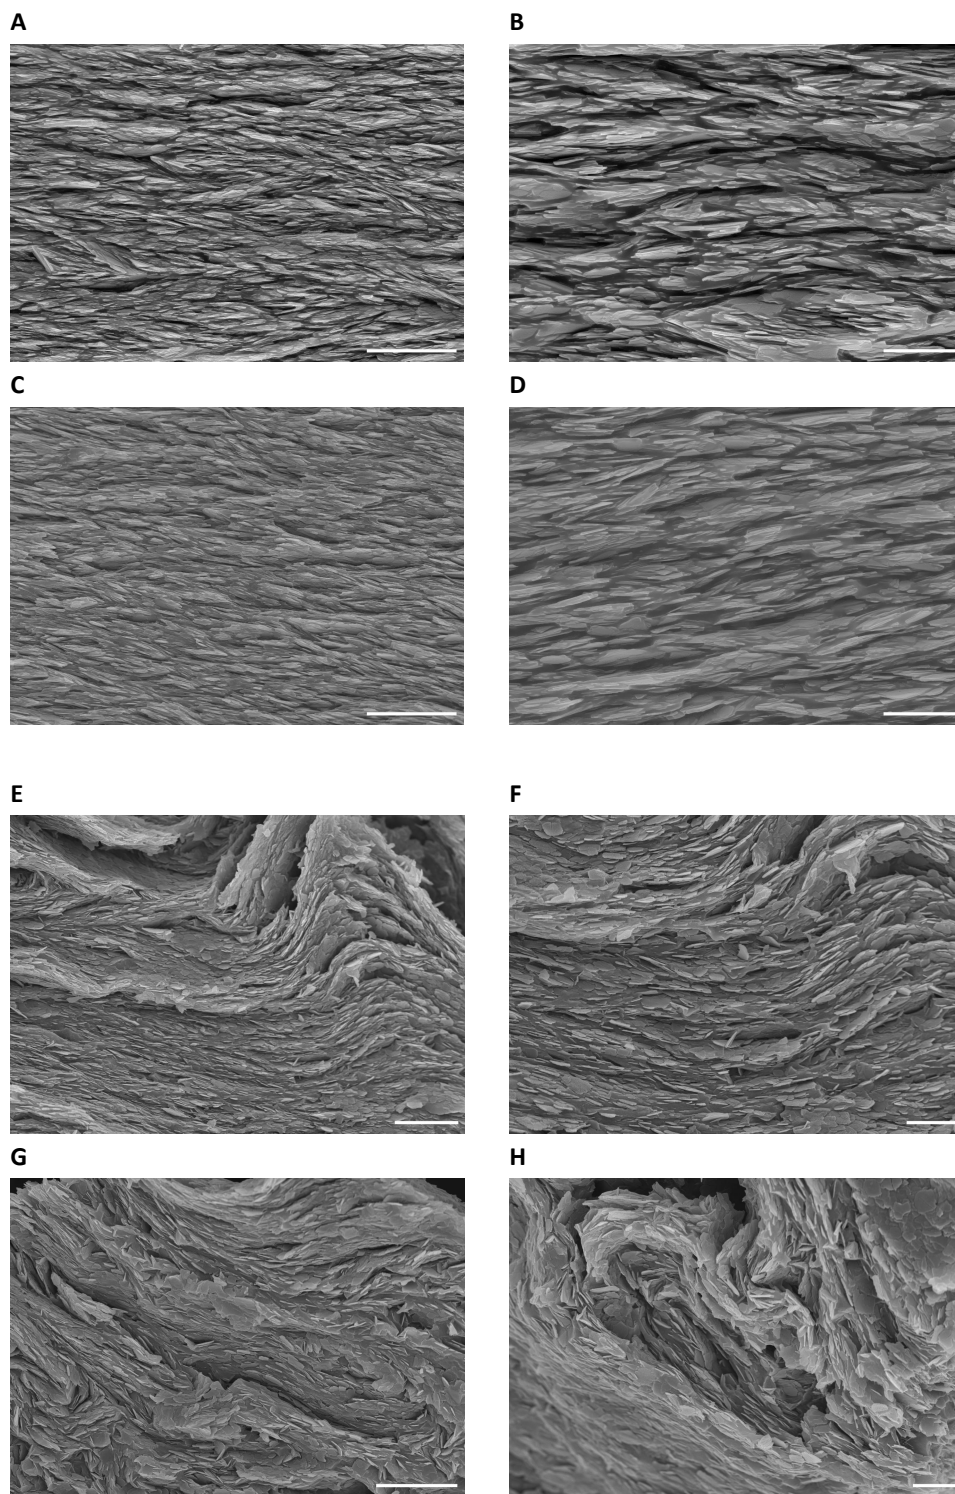

**Figure S10.** Cross-sectional scanning electron microscopy images showing the discotic nematic liquid crystalline phases formed by colloidal nanoplatelets of  $(\text{C}_6\text{H}_5\text{-CH}_2\text{-CH}_2\text{-NH}_3)_2\text{PbBr}_4$  (**A-D**) and  $(4\text{-F-C}_6\text{H}_4\text{-CH}_2\text{-NH}_3)_2\text{MnCl}_4$  (**E-H**). Scale bars: 5  $\mu\text{m}$  (**A,C,E,G**), 2  $\mu\text{m}$  (**B,D,F,H**).

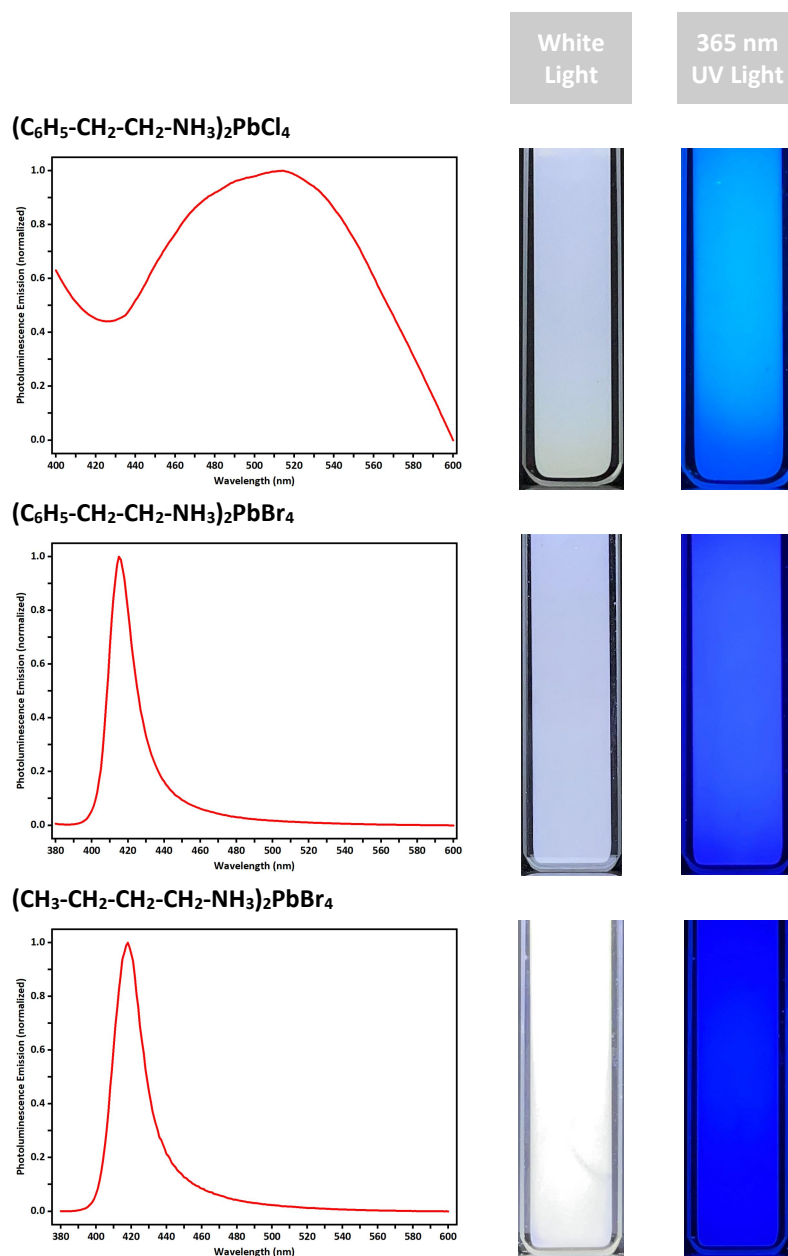

**Figure S11.** Photoluminescence emission spectra of the crystalline powders (red curves) and colloidal liquid crystalline dispersions (blue curves) of  $(\text{C}_6\text{H}_5\text{-CH}_2\text{-CH}_2\text{-NH}_3)_2\text{PbCl}_4$ ,  $(\text{C}_6\text{H}_5\text{-CH}_2\text{-CH}_2\text{-NH}_3)_2\text{PbBr}_4$ , and  $(\text{CH}_3\text{-CH}_2\text{-CH}_2\text{-CH}_2\text{-NH}_3)_2\text{PbBr}_4$ . Photographs of these liquid crystals (sealed in quartz cuvettes with an internal width of 10 mm and an optical path length of 0.5 mm, observed under white light and 365-nm ultraviolet light) are displayed next to the spectra plots.

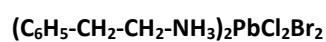

Photoluminescence Emission Spectrum

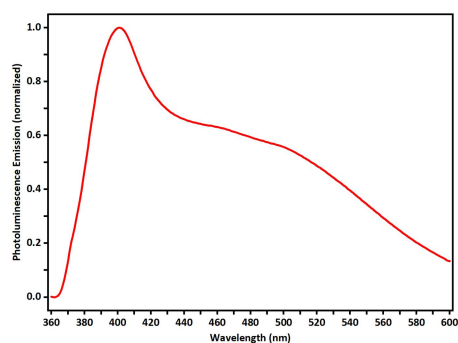

White  
Light

365 nm  
UV Light

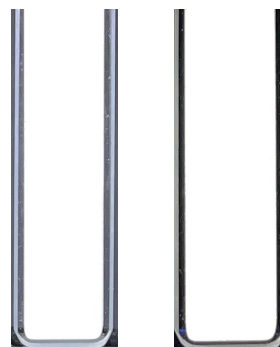

Powder X-ray Diffraction Patterns

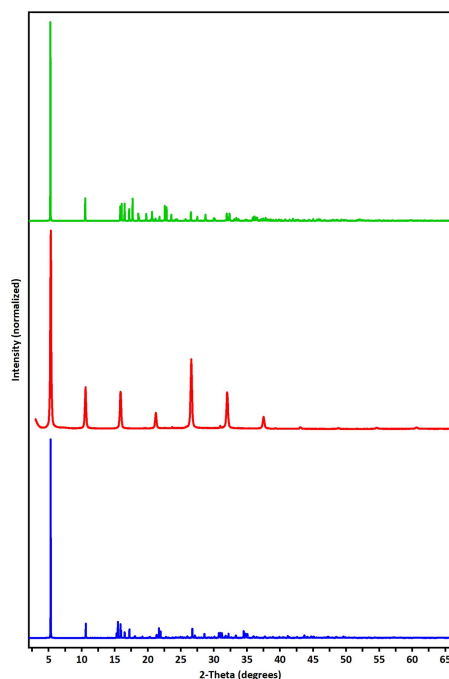

**Figure S12.** Additional data for liquid crystalline dispersions of  $(\text{C}_6\text{H}_5\text{-CH}_2\text{-CH}_2\text{-NH}_3)_2\text{PbCl}_2\text{Br}_2$  perovskite nanocrystals:

(1) Photoluminescence emission spectrum.

(2) Photographs. The liquid crystal was sealed in a quartz cuvette with an internal width of 10 mm and an optical path length of 0.5 mm. The photos were taken under white light and 365-nm ultraviolet light.

(3) Powder X-ray diffraction pattern of a spin-coated and dried film of the liquid crystal (middle red curve). Simulated PXRD patterns (based on single-crystal X-ray diffraction profiles) of  $(\text{C}_6\text{H}_5\text{-CH}_2\text{-CH}_2\text{-NH}_3)_2\text{PbCl}_4$  (upper green curve) and  $(\text{C}_6\text{H}_5\text{-CH}_2\text{-CH}_2\text{-NH}_3)_2\text{PbBr}_4$  (lower blue curve) are also displayed for comparison.



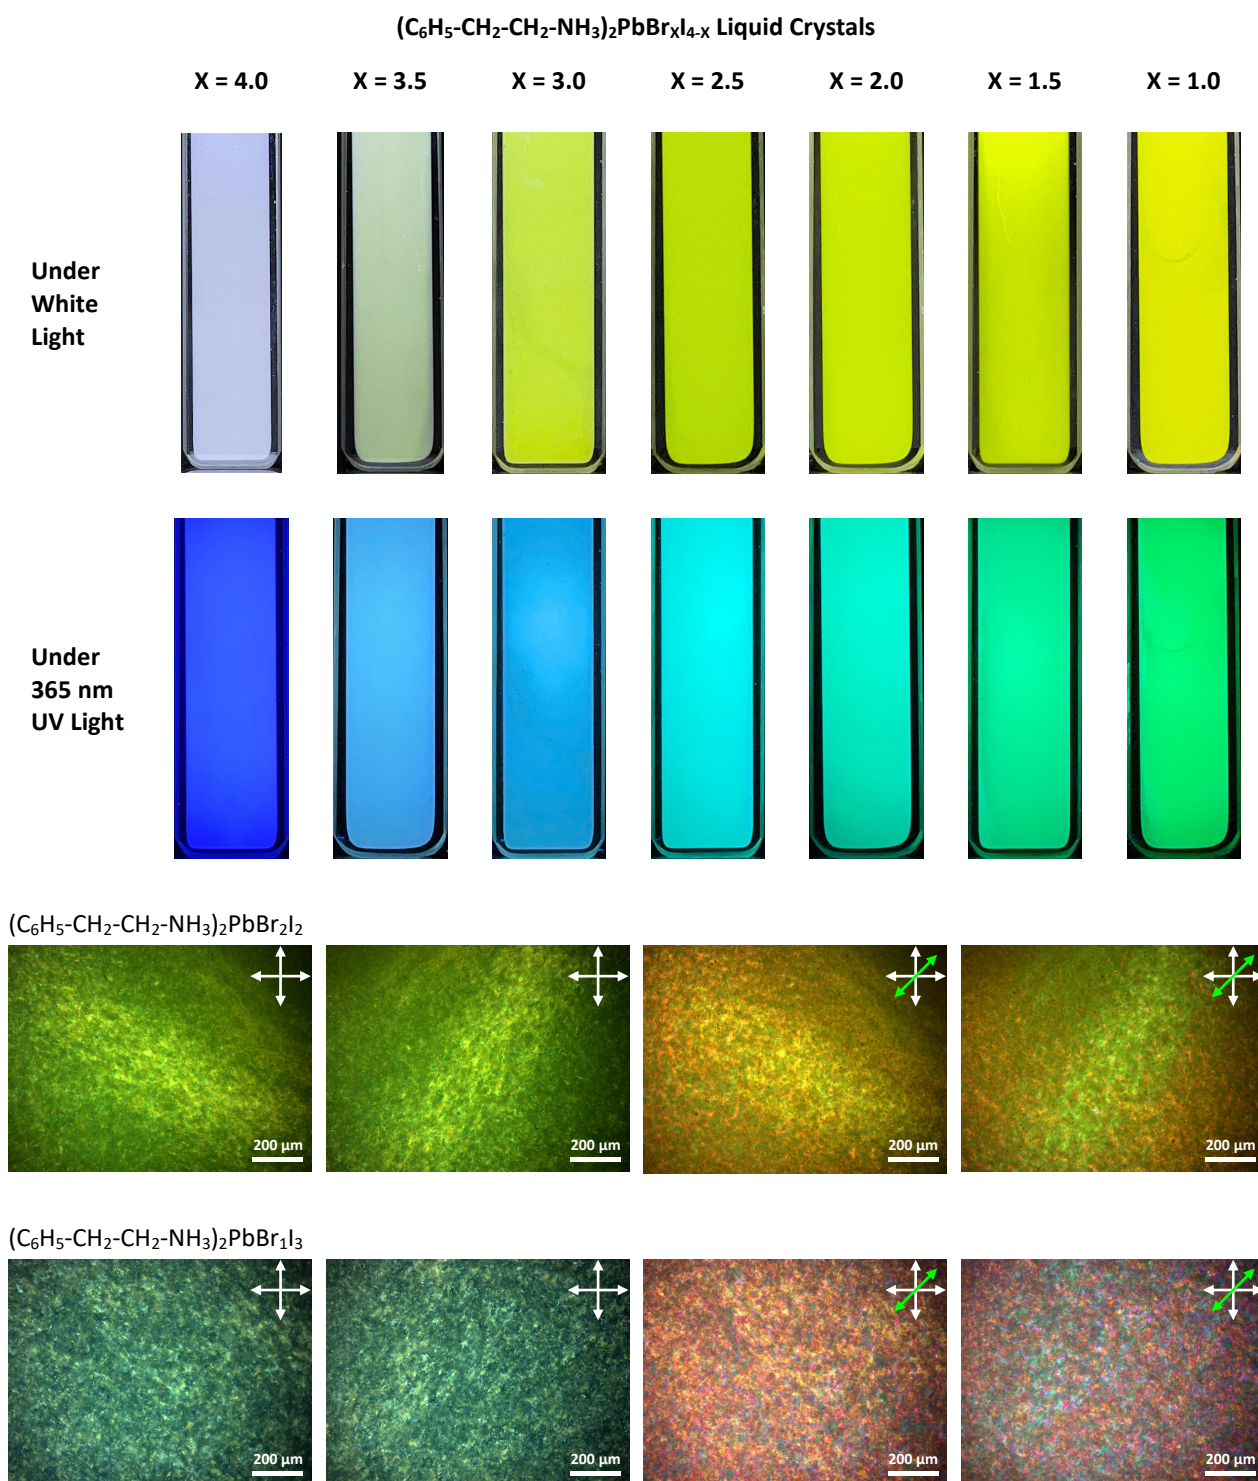

**Figure S13.** Additional data for  $(\text{C}_6\text{H}_5\text{-CH}_2\text{-CH}_2\text{-NH}_3)_2\text{PbBr}_{\text{x}}\text{I}_{4-\text{x}}$  liquid crystals:

- (1) Photographs. The liquid crystal was sealed in a quartz cuvette with an internal width of 10 mm and an optical path length of 0.5 mm. The photos were taken under white light and 365-nm ultraviolet light.
- (2) Polarized optical microscopy images.

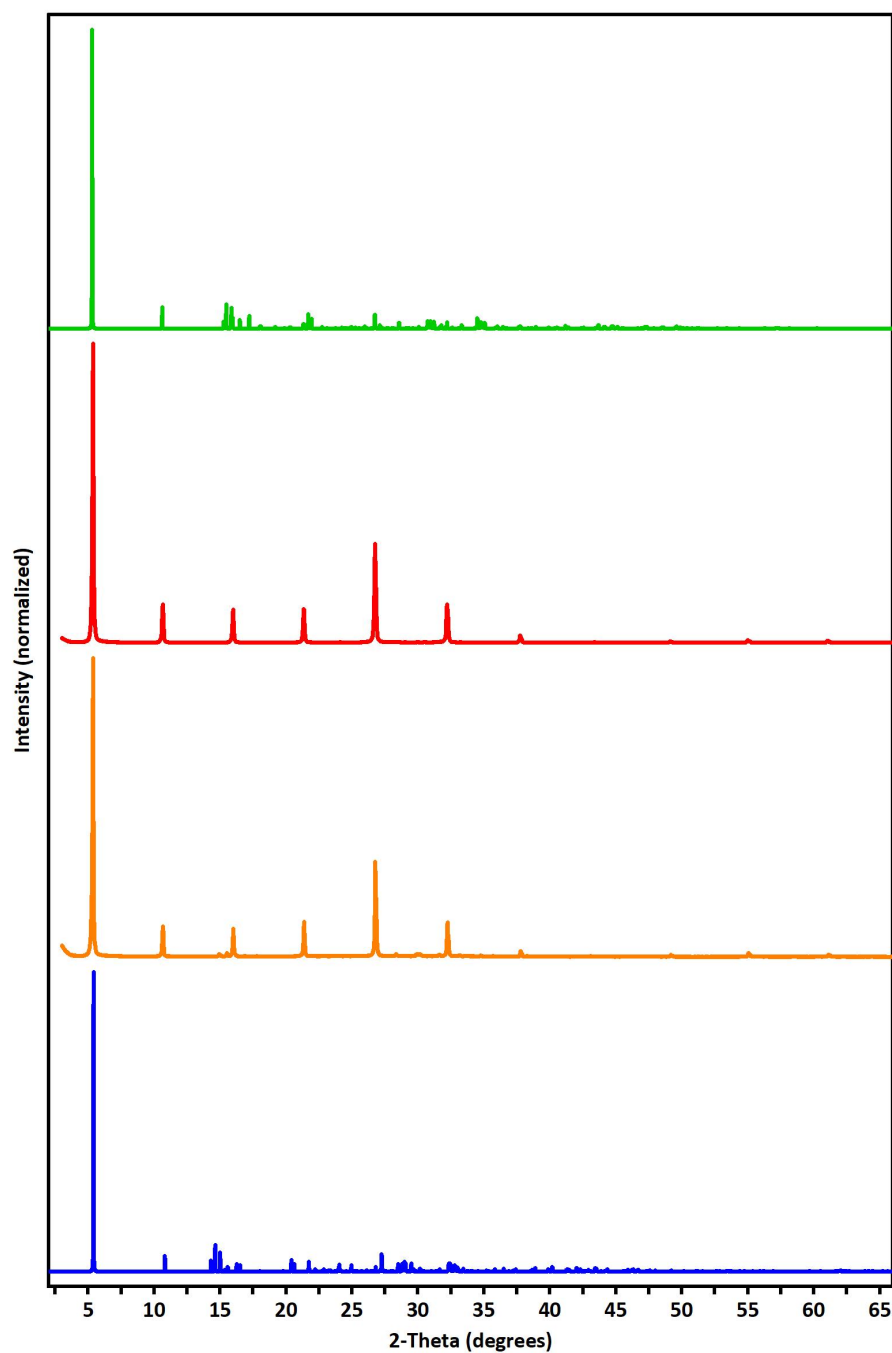

**Figure S14.** Powder X-ray diffraction patterns of spin-coated and dried films of colloidal liquid crystalline dispersions of  $(\text{C}_6\text{H}_5\text{-CH}_2\text{-CH}_2\text{-NH}_3)_2\text{PbBr}_2\text{I}_2$  (red-colored curve) and  $(\text{C}_6\text{H}_5\text{-CH}_2\text{-CH}_2\text{-NH}_3)_2\text{PbBr}_1\text{I}_3$  (orange-colored curve) perovskites. Simulated PXRD patterns (based on single-crystal X-ray diffraction profiles) of  $(\text{C}_6\text{H}_5\text{-CH}_2\text{-CH}_2\text{-NH}_3)_2\text{PbBr}_4$  (green-colored curve at the top) and  $(\text{C}_6\text{H}_5\text{-CH}_2\text{-CH}_2\text{-NH}_3)_2\text{PbI}_4$  (blue-colored curve at the bottom) are also displayed for comparison.

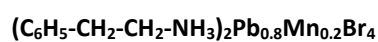

Photoluminescence Emission Spectrum

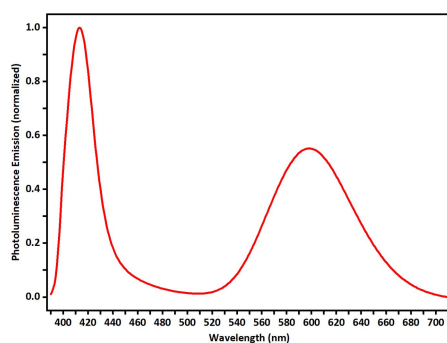

White  
Light

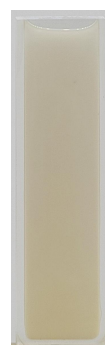

365 nm  
UV Light

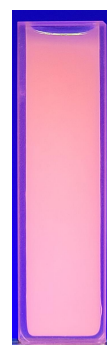

Powder X-ray Diffraction Patterns

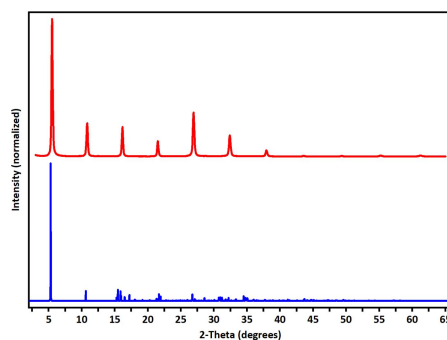

Polarized Optical Microscopy Images

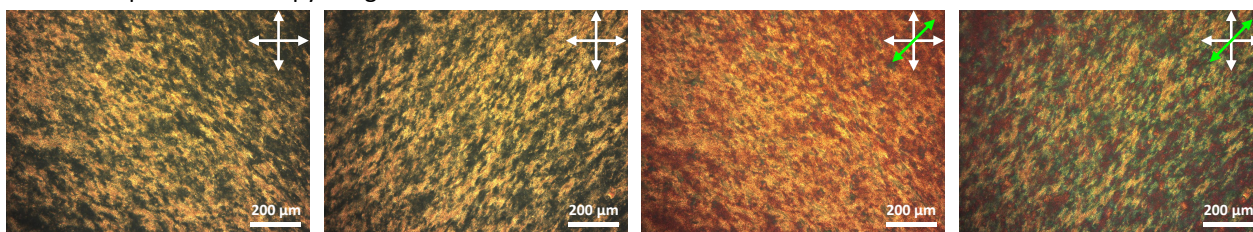

**Figure S15.** Additional data for  $(\text{C}_6\text{H}_5\text{-CH}_2\text{-CH}_2\text{-NH}_3)_2\text{Pb}_{0.8}\text{Mn}_{0.2}\text{Br}_4$  perovskite liquid crystals:

- (1) Photoluminescence emission spectrum.
- (2) Photographs. The liquid crystal was sealed in a quartz cuvette with an internal width of 10 mm and an optical path length of 0.5 mm. The photos were taken under white light and 365-nm ultraviolet light.
- (3) Powder X-ray diffraction pattern of a spin-coated and dried film of the liquid crystal (red curve). The simulated PXRD pattern (based on single-crystal XRD data) of  $(\text{C}_6\text{H}_5\text{-CH}_2\text{-CH}_2\text{-NH}_3)_2\text{PbBr}_4$  (blue curve) is displayed for comparison.
- (4) Polarized optical microscopy images.

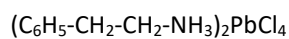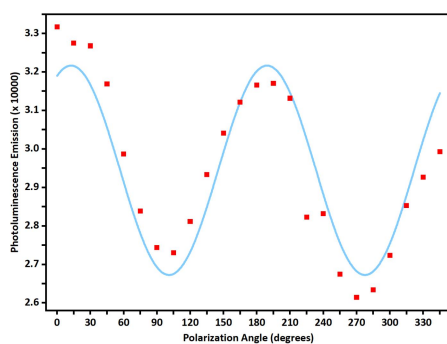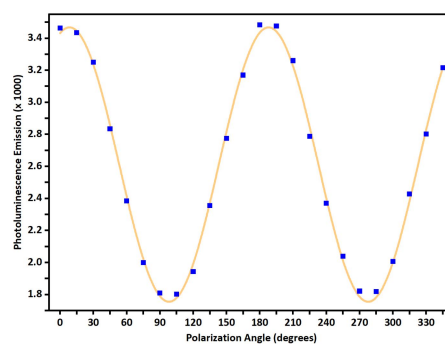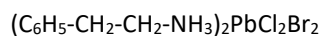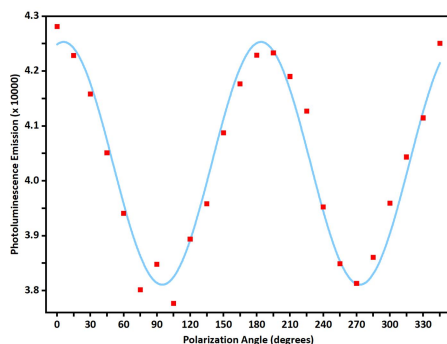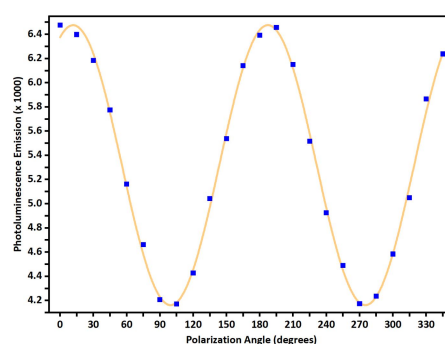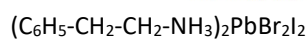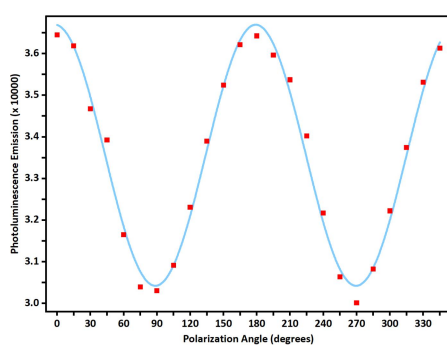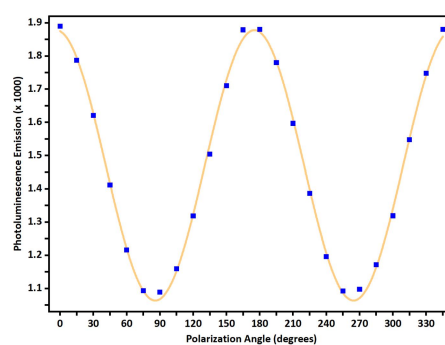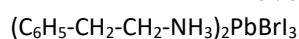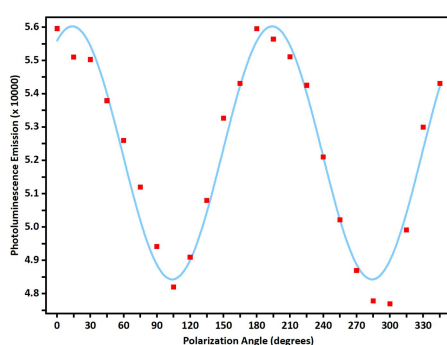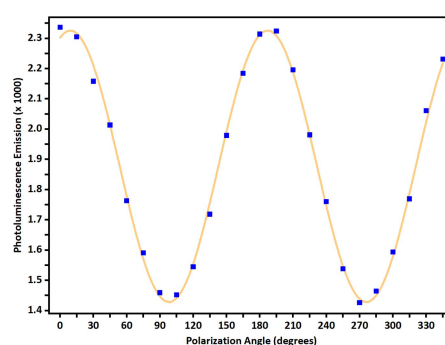

**Figure S16.** Linearly polarized photoluminescence (the left column) and polarization-dependent light-responsiveness (the right column) of colloidal liquid crystalline dispersions of  $(\text{C}_6\text{H}_5\text{-CH}_2\text{-CH}_2\text{-NH}_3)_2\text{PbCl}_4$ ,  $(\text{C}_6\text{H}_5\text{-CH}_2\text{-CH}_2\text{-NH}_3)_2\text{PbCl}_2\text{Br}_2$ ,  $(\text{C}_6\text{H}_5\text{-CH}_2\text{-CH}_2\text{-NH}_3)_2\text{PbBr}_2\text{I}_2$ , and  $(\text{C}_6\text{H}_5\text{-CH}_2\text{-CH}_2\text{-NH}_3)_2\text{PbBrI}_3$  perovskite nanoplatelets (from top to bottom).

**Table S1.** Degree of polarization values of colloidal liquid crystalline dispersions of perovskite nanoplatelets.

|                                                                                        | Polarized Photoluminescence<br>Light Emission | Polarization-Dependent<br>Light-Responsiveness |
|----------------------------------------------------------------------------------------|-----------------------------------------------|------------------------------------------------|
| $(\text{C}_6\text{H}_5\text{-CH}_2\text{-CH}_2\text{-NH}_3)_2\text{PbCl}_4$            | 0.12                                          | 0.32                                           |
| $(\text{C}_6\text{H}_5\text{-CH}_2\text{-CH}_2\text{-NH}_3)_2\text{PbCl}_2\text{Br}_2$ | 0.06                                          | 0.22                                           |
| $(\text{C}_6\text{H}_5\text{-CH}_2\text{-CH}_2\text{-NH}_3)_2\text{PbBr}_2\text{I}_2$  | 0.10                                          | 0.27                                           |
| $(\text{C}_6\text{H}_5\text{-CH}_2\text{-CH}_2\text{-NH}_3)_2\text{PbBr}_1\text{I}_3$  | 0.08                                          | 0.24                                           |
